# Supplementary material
Source: Springer Nature journal article supplement (https://www.springermedizin.de/resource/supplementary/12890_2010_259_MOESM1_ESM.pdf/9504818)

# miR-126

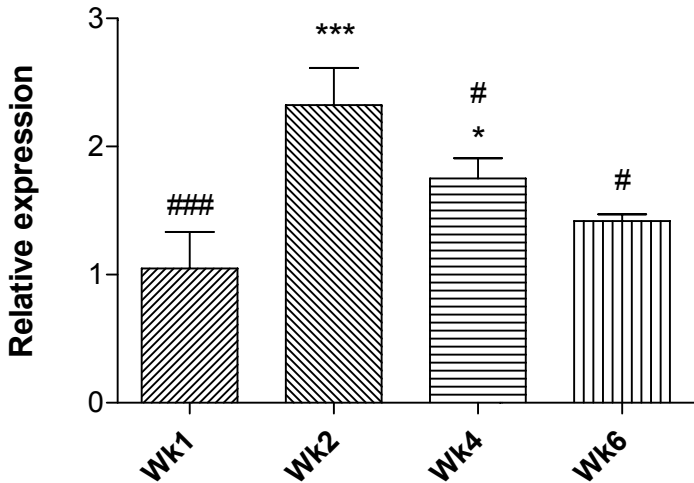

Supplement: MOESM1 [file 9504818]
